# Supplementary material
Source: PubMed Central journal article supplement (PMC8975027)
Supplement: CJN.10300721SupplementaryData1.pdf [file CJN.10300721SupplementaryData1.pdf]

# Vaccination and COVID-19 Dynamics in Dialysis Patients

## Supplemental Material

|                                                                                                                                                                                                                                                                                                                                                               |   |
|---------------------------------------------------------------------------------------------------------------------------------------------------------------------------------------------------------------------------------------------------------------------------------------------------------------------------------------------------------------|---|
| Statistical model .....                                                                                                                                                                                                                                                                                                                                       | 2 |
| Supplemental Tables .....                                                                                                                                                                                                                                                                                                                                     | 4 |
| <i>Supplemental Table 1 : Description of the study populations</i> .....                                                                                                                                                                                                                                                                                      | 4 |
| <i>Supplemental Table 2 : Crude number of hospitalizations, total at-risk population, cumulative incidence in dialysis and the general population and relative risk of hospitalization according to age classes and epidemic waves</i> .....                                                                                                                  | 5 |
| <i>Supplemental Table 3 : Relative risks (95% credible intervals) of severe infection in dialysis patients, predicted from model M<sub>3</sub>, between April 2 and April 8, 2021 in Paris.</i> .....                                                                                                                                                         | 6 |
| <i>Supplemental Table 4 : Coefficients from the Poisson regression (exponentiated and reported as incidence rate ratios with their 95% credible intervals): model M3 (3- and 5-week lags between first dose and expected protection in the general population and in dialysis patients, respectively) and additional model with 3-week lags for all</i> ..... | 7 |
| References .....                                                                                                                                                                                                                                                                                                                                              | 8 |

## **Statistical model**

### ***Infection dates***

Infection dates in hemodialysis patients were actually those of diagnoses (either suspicious clinical symptom or chest scan / positive RT-PCR), which can be approximately considered as the dates of symptoms onset (1). Dates for severe infections in the general population were those of hospital admissions. In order to relate severe infections in dialysis patients (with known dates of symptoms onset) to those occurring simultaneously in the general population (with known dates of hospital admission), we subtracted the expected delay between symptoms onset and hospital admission. The chosen 11-day lag applied to hospitalization dates relies on previous estimates (2) and was already used in several modeling studies (3,4).

### ***Modeling***

We modeled weekly incidences SARS-CoV-2 severe infections (COVID-19 cases leading to hospital admissions) in dialysis patients from same-age incidences in the general population, with the use of hierarchical Bayesian Poisson regressions accounting for spatial autocorrelation.

All multivariable models were built from the following pattern:

$$\log \left( \frac{E(n_{a,d,w})}{e_{a,d,w}} \right) = \alpha + \beta \log(N_{a,d,w}) + \gamma_a a + \dots + \omega_d$$

With:

- $E(n_{a,d,w})$ : expected number of cases in dialysis patients for age class  $a$  in department  $d$  on week  $w$  ( $n_{a,d,w}$  following a Poisson distribution);
- $e_{a,d,w}$ : exposed (at-risk) MHD patients for the same age / department / week;
- $N_{a,d,w}$ : estimated incidence of severe infections in the general population for age class  $a$  in department  $d$  on week  $w$ ;
- $\beta, \gamma_a$ : fixed effects to be estimated;
- $\omega_d$ : random effect accounting for spatial autocorrelation in department  $d$ ;
- ... : optional predictors with their associated fixed effects.

Spatial random effects were estimated with a covariance structure depending on neighborhood departments from a BYM model (5). Bayesian inference was performed using integrated nested Laplace approximation (6) and weakly informative priors.

Optional predictors were considered to fit the models:

- estimated incidence of severe infections in the general population for age class  $a$  in department  $d$  on week  $w - 1$ ;
- epidemic wave on week  $w$  (dummy variables to identify epidemic waves 1 to 3);
- vaccination coverage (1<sup>st</sup> dose) in the general population in department  $d$  on week  $w - 3$  (either in the age class  $a$  or globally);
- vaccination coverage (1<sup>st</sup> dose) in MHD patients in department  $d$  on week  $w - 3$  (data stratified by age class was not available).

Other regression models (zero-inflated Poisson and negative binomial) were also considered to improve goodness-of-fit.

Predictors were selected to improve goodness-of-fit according to the Watanabe–Akaike information criterion (WAIC).

The following models were selected:

$$M_1: \log\left(\frac{E(n_{a,d,w})}{e_{a,d,w}}\right) = \alpha + \beta \log(N_{a,d,w}) + \beta' \log(N_{a,d,w-1}) + \gamma_a a + \omega_d$$

$$M_2: \log\left(\frac{E(n_{a,d,w})}{e_{a,d,w}}\right) = \alpha + \beta \log(N_{a,d,w}) + \beta' \log(N_{a,d,w-1}) + \gamma_a a + \delta k_w + \omega_d$$

With  $k_w$  taking values according to the epidemic wave ( $k_w = 0$  if week  $w$  falls into the 1<sup>st</sup> wave and 1 otherwise) and  $\delta$  the associated fixed effect to be estimated.

$$M_3: \log\left(\frac{E(n_{a,d,w})}{e_{a,d,w}}\right) = \alpha + \beta \log(N_{a,d,w}) + \beta' \log(N_{a,d,w-1}) + \gamma_a a + \delta k_w \\ + \xi_0 u_{a,d,w-5} + \xi_a a \times u_{a,d,w-5} + \zeta v_{a,d,w-3} + \omega_d$$

With  $u_{a,d,w}$  and  $v_{a,d,w}$  the vaccination coverages in MHD patients and in the general population, respectively, for age class  $a$  on week  $w$  in department  $d$ ,  $\xi_0$  and  $\zeta$  the associated fixed effects and  $\xi_a$  the fixed effect for interaction between  $a$  and  $u_{a,d,w}$  to be estimated. The 3- and 5-week time lapses were set to account for a humoral response likely to impact incidence in the general population (7–10) and dialysis patients (11,12), respectively. All analyses were conducted with R statistical software version 4.0. Models were fitted with the INLA package (13).

## **Supplemental Tables**

**Supplemental Table 1 :** Description of the study populations

|                             | <b>Dialysis<br/>patients (%)</b> | <b>General<br/>population (%)</b> |
|-----------------------------|----------------------------------|-----------------------------------|
| Female sex                  | 38.5                             | 52.8                              |
| Age class (years)           |                                  |                                   |
| • 25-35                     | 2.2                              | 16.3                              |
| • 35-45                     | 4.7                              | 17.6                              |
| • 45-55                     | 8.7                              | 18.6                              |
| • 55-65                     | 16.3                             | 17.9                              |
| • 65-75                     | 28.5                             | 16.0                              |
| • 75-85                     | 26.1                             | 8.7                               |
| • > 85                      | 13.6                             | 4.9                               |
| Medical history             |                                  |                                   |
| • Diabetes                  | 44.1                             |                                   |
| • Cancer                    | 10.2                             |                                   |
| • Respiratory disease       | 15.8                             |                                   |
| • Coronary heart disease    | 24.8                             |                                   |
| • Peripheral artery disease | 22.8                             |                                   |
| • Stroke                    | 12.1                             |                                   |
| • Obesity                   | 25.0                             |                                   |

**Supplemental Table 2 :** Crude number of hospitalizations, total at-risk population, cumulative incidence in dialysis and the general population and relative risk of hospitalization according to age classes and epidemic waves

|              |                 | Dialysis patients   |                              |                             | General population  |                              |                             | Relative risk<br>(95% CI) |
|--------------|-----------------|---------------------|------------------------------|-----------------------------|---------------------|------------------------------|-----------------------------|---------------------------|
| Age<br>class | wave            | At-risk<br>subjects | COVID-19<br>hospitalizations | Cumulative<br>incidence (%) | At-risk<br>subjects | COVID-19<br>hospitalizations | Cumulative<br>incidence (%) |                           |
| 25-55        | 1 <sup>st</sup> | 7050                | 159                          | 2.3%                        | 24,184,787          | 18,981                       | 0.1%                        | 28.7 (24.6, 33.6)         |
|              | 2 <sup>nd</sup> | 7204                | 116                          | 1.6%                        | 24,122,679          | 26,903                       | 0.1%                        | 14.4 (12, 17.3)           |
|              | 3 <sup>rd</sup> | 6986                | 75                           | 1.1%                        | 24,060,571          | 34,460                       | 0.1%                        | 7.5 (6, 9.4)              |
| 55-75        | 1 <sup>st</sup> | 19,304              | 512                          | 2.7%                        | 15,328,488          | 32,833                       | 0.2%                        | 12.4 (11.3, 13.5)         |
|              | 2 <sup>nd</sup> | 20,522              | 612                          | 3%                          | 15,433,881          | 56,158                       | 0.4%                        | 8.2 (7.6, 8.9)            |
|              | 3 <sup>rd</sup> | 20,144              | 395                          | 2%                          | 15,539,273          | 60,795                       | 0.4%                        | 5 (4.5, 5.5)              |
| > 75         | 1 <sup>st</sup> | 16,974              | 562                          | 3.3%                        | 6,194,203           | 47,424                       | 0.8%                        | 4.3 (4, 4.7)              |
|              | 2 <sup>nd</sup> | 18,086              | 719                          | 4%                          | 6,217,063           | 94,375                       | 1.5%                        | 2.6 (2.4, 2.8)            |
|              | 3 <sup>rd</sup> | 18,036              | 470                          | 2.6%                        | 6,239,923           | 74,961                       | 1.2%                        | 2.2 (2, 2.4)              |

**Supplemental Table 3 :** Relative risks (95% credible intervals) of severe infection in dialysis patients, predicted from model M<sub>3</sub>, between April 2 and April 8, 2021 in Paris.

| Age class (years) | Vaccine exposure  |                   |
|-------------------|-------------------|-------------------|
|                   | No                | Yes               |
| 25-35             | 0.74 (0.50, 1.09) | 0.00 (0.00, 12.4) |
| 35-45             | 1.01 (0.76, 1.35) | 0.02 (0.00, 0.21) |
| 45-55             | 0.98 (0.77, 1.26) | 0.20 (0.07, 0.54) |
| 55-65             | 1 (reference)     | 0.37 (0.20, 0.69) |
| 65-75             | 0.89 (0.72, 1.11) | 0.31 (0.19, 0.52) |
| 75-85             | 0.70 (0.56, 0.87) | 0.45 (0.27, 0.73) |
| > 85              | 0.67 (0.53, 0.84) | 0.57 (0.30, 1.06) |

*These relative risks of severe infection depend on the considered week and department, as their estimations use data on local vaccination coverage in dialysis patients and the general population. For this example, we chose the week and department with the highest number of cases during the third wave.*

**Supplemental Table 4 :** Coefficients from the Poisson regression (exponentiated and reported as incidence rate ratios with their 95% credible intervals): model M3 (3- and 5-week lags between first dose and expected protection in the general population and in dialysis patients, respectively) and additional model with 3-week lags for all.

| Variable                                                          | Model M3<br>(3- and 5-week lags) | Sensitivity analysis<br>(3-week-lags) |
|-------------------------------------------------------------------|----------------------------------|---------------------------------------|
| Age class (years)                                                 |                                  |                                       |
| - 25-35                                                           | 2.92 (2.03, 4.09)                | 2.85 (1.97, 4.02)                     |
| - 35-45                                                           | 2.19 (1.74, 2.73)                | 2.20 (1.75, 2.74)                     |
| - 45-55                                                           | 1.32 (1.11, 1.56)                | 1.35 (1.14, 1.60)                     |
| - 55-65                                                           | 1 (reference)                    | 1 (reference)                         |
| - 65-75                                                           | 0.88 (0.78, 0.98)                | 0.87 (0.78, 0.98)                     |
| - 75-85                                                           | 0.78 (0.70, 0.88)                | 0.77 (0.69, 0.87)                     |
| - > 85                                                            | 0.86 (0.76, 0.97)                | 0.84 (0.74, 0.96)                     |
| Epidemic wave $\geq 2$                                            | 0.70 (0.64, 0.76)                | 0.69 (0.64, 0.75)                     |
| Vaccination coverage in the general population (per 10% increase) | 0.50 (0.40, 0.61)                | 0.47 (0.38, 0.58)                     |
| Vaccine exposure in dialysis patients                             | 0.37 (0.18, 0.71)                | 0.46 (0.26, 0.78)                     |
| Age class–vaccine interaction (years)                             |                                  |                                       |
| - 25-35                                                           | 0.00 (0.00, 4.66)                | 0.12 (0.00, 1.59)                     |
| - 35-45                                                           | 0.04 (0.00, 0.46)                | 0.13 (0.02, 1.56)                     |
| - 45-55                                                           | 0.55 (0.16, 1.72)                | 0.38 (0.13, 1.04)                     |
| - 55-65                                                           | 1 (reference)                    | 1 (reference)                         |
| - 65-75                                                           | 0.94 (0.43, 2.11)                | 0.99 (0.53, 1.87)                     |
| - 75-85                                                           | 1.74 (0.80, 3.86)                | 1.80 (0.98, 3.37)                     |
| - > 85                                                            | 2.30 (0.95, 5.56)                | 2.48 (1.25, 4.92)                     |

## **References**

1. Couchoud C, Bayer F, Ayav C, Béchade C, Brunet P, Chantrel F, et al. Low incidence of SARS-CoV-2, risk factors of mortality and the course of illness in the French national cohort of dialysis patients. *Kidney International*. 2020 Dec 1;98(6):1519–29.
2. Zhou F, Yu T, Du R, Fan G, Liu Y, Liu Z, et al. Clinical course and risk factors for mortality of adult inpatients with COVID-19 in Wuhan, China: a retrospective cohort study. *Lancet*. 2020 28;395(10229):1054–62.
3. Salje H, Kiem CT, Lefrancq N, Courtejoie N, Bosetti P, Paireau J, et al. Estimating the burden of SARS-CoV-2 in France. *Science*. 2020 Jul 10;369(6500):208–11.
4. Hozé N, Paireau J, Lapidus N, Kiem CT, Salje H, Severi G, et al. Monitoring the proportion of the population infected by SARS-CoV-2 using age-stratified hospitalisation and serological data: a modelling study. *The Lancet Public Health*. 2021 Jun 1;6(6):e408–15.
5. Besag J, York J, Mollié A. Bayesian image restoration, with two applications in spatial statistics. *Ann Inst Stat Math*. 1991 Mar 1;43(1):1–20.
6. Gomez-Rubio V. Bayesian inference with INLA. CRC Press; 2020. 308 p.
7. Bernal JL, Andrews N, Gower C, Robertson C, Stowe J, Tessier E, et al. Effectiveness of the Pfizer-BioNTech and Oxford-AstraZeneca vaccines on covid-19 related symptoms, hospital admissions, and mortality in older adults in England: test negative case-control study. *BMJ*. 2021 May 13;373:n1088.
8. Vasileiou E, Simpson CR, Shi T, Kerr S, Agrawal U, Akbari A, et al. Interim findings from first-dose mass COVID-19 vaccination roll-out and COVID-19 hospital admissions in Scotland: a national prospective cohort study. *The Lancet*. 2021 May 1;397(10285):1646–57.
9. Thompson MG. Interim Estimates of Vaccine Effectiveness of BNT162b2 and mRNA-1273 COVID-19 Vaccines in Preventing SARS-CoV-2 Infection Among Health Care Personnel, First Responders, and Other Essential and Frontline Workers — Eight U.S. Locations, December 2020–March 2021. *MMWR Morb Mortal Wkly Rep* [Internet]. 2021 [cited 2021 Nov 9];70. Available from: <https://www.cdc.gov/mmwr/volumes/70/wr/mm7013e3.htm>
10. Wei J, Stoesser N, Matthews PC, Ayoubkhani D, Studley R, Bell I, et al. Antibody responses to SARS-CoV-2 vaccines in 45,965 adults from the general population of the United Kingdom. *Nat Microbiol*. 2021 Sep;6(9):1140–9.
11. Van Praet J, Reynders M, De Bacquer D, Viaene L, Schoutteten M, Caluwé R, et al. Predictors and Dynamics of the Humoral and Cellular Immune Response to SARS-CoV-2 mRNA Vaccines in Hemodialysis Patients: A Multicenter Observational Study. *J Am Soc Nephrol*. 2021 Sep 29;ASN.2021070908.
12. Stumpf J, Siepmann T, Lindner T, Karger C, Schwöbel J, Anders L, et al. Humoral and cellular immunity to SARS-CoV-2 vaccination in renal transplant versus dialysis patients: A prospective, multicenter observational study using mRNA-1273 or BNT162b2 mRNA vaccine. *The Lancet Regional Health - Europe*. 2021 Oct 1;9:100178.
13. Rue H, Martino S, Chopin N. Approximate Bayesian inference for latent Gaussian models by using integrated nested Laplace approximations. *Journal of the Royal Statistical Society: Series B (Statistical Methodology)*. 2009;71(2):319–92.
